# Supplementary material for: Carrier transport in bulk and two-dimensional Zn2(V,Nb,Ta)N3 ternary nitrides
Source: Royal Society of Chemistry journal article supplement (doi:10.1039/d4nr01292e), 2024-01-01
Supplement: d4nr01292e1.pdf [file d4nr01292e1.pdf]

**Supplementary Material**  
**for**  
**Carrier Transport in Bulk and Two-Dimensional**  
**Zn<sub>2</sub>(V, Nb, Ta)N<sub>3</sub> Ternary Nitrides**

Igor V. Kosarev, Andrey A. Kistanov\*

*The Laboratory of Metals and Alloys Under Extreme Impacts, Ufa University of Science and Technology, Ufa 450076, Russia*

\*Correspondence: [andrei.kistanov.ufa@gmail.com](mailto:andrei.kistanov.ufa@gmail.com);

**Table S1.** The calculated elastic constants  $C_{ij}$  for bulk  $Zn_2(V, Nb, Ta)N_3$ .

| Elastic constants | bulk $Zn_2VN_3$ , GPa | bulk $Zn_2NbN_3$ , GPa | bulk $Zn_2TaN_3$ , GPa |
|-------------------|-----------------------|------------------------|------------------------|
| $C_{11}$          | 235                   | 217                    | 219                    |
| $C_{22}$          | 239                   | 210                    | 210                    |
| $C_{33}$          | 258                   | 221                    | 231                    |
| $C_{12}$          | 105                   | 99                     | 96                     |
| $C_{13}$          | 114                   | 112                    | 112                    |
| $C_{23}$          | 103                   | 95                     | 95                     |
| $C_{44}$          | 59                    | 52                     | 54                     |
| $C_{55}$          | 55                    | 49                     | 51                     |
| $C_{66}$          | 52                    | 52                     | 53                     |

**Table S2.** The Young modulus for 2D  $Zn_2(V, Nb, Ta)N_3$ .

| Material         | $E_{xx}$ , N/m | $E_{yy}$ , N/m |
|------------------|----------------|----------------|
| bulk $Zn_2VN_3$  | 109            | 108            |
| bulk $Zn_2NbN_3$ | 87             | 95             |
| bulk $Zn_2TaN_3$ | 88             | 88             |

**Table S3.** Cohesive energy for bulk and 2D  $Zn_2(V, Nb, Ta)N_3$ .

| Structure        | Cohesive energy, eV per atom |
|------------------|------------------------------|
| bulk $Zn_2VN_3$  | -3.84                        |
| bulk $Zn_2NbN_3$ | -4.11                        |
| bulk $Zn_2TaN_3$ | -4.21                        |
| 2D $Zn_2VN_3$    | -3.60                        |
| 2D $Zn_2NbN_3$   | -3.82                        |
| 2D $Zn_2TaN_3$   | -3.91                        |

**Table S4.** Calculated charge carrier effective mass ( $m_x^*$ ,  $m_y^*$  and  $m_z^*$  in units of electron mass  $m_0$ ), deformation potential ( $\delta_x$ ,  $\delta_y$ , and  $\delta_z$ , eV), mobility ( $\mu_x$ ,  $\mu_y$ , and  $\mu_z$ ,  $\text{cm}^2/\text{V}\cdot\text{s}$ ), and relaxation time ( $\tau_x$ ,  $\tau_y$  and  $\tau_z$ , ps) in bulk  $\text{Zn}_2(\text{V}, \text{Nb}, \text{Ta})\text{N}_3$  at  $T = 300$  K.

| Material                  | Reciprocal coordinate | $m_x^*/m_0$ | $m_y^*/m_0$ | $m_z^*/m_0$ | $\delta_x$ | $\delta_y$ | $\delta_z$ | $\mu_x$           | $\mu_y$           | $\mu_z$           | $\tau_x$ | $\tau_y$ | $\tau_z$ |
|---------------------------|-----------------------|-------------|-------------|-------------|------------|------------|------------|-------------------|-------------------|-------------------|----------|----------|----------|
| $\text{Zn}_2\text{VN}_3$  | Electrons             |             |             |             |            |            |            |                   |                   |                   |          |          |          |
|                           | (-0.500; 0.500; 0)    | 0.94        | 0.87        | 0.60        | 7.83       | 8.78       | 6.75       | $2.73 \cdot 10^2$ | $2.64 \cdot 10^2$ | $1.26 \cdot 10^3$ | 0.15     | 0.13     | 0.43     |
| $\text{Zn}_2\text{VN}_3$  | Holes                 |             |             |             |            |            |            |                   |                   |                   |          |          |          |
|                           | (0.314; 0.314; 0)     | 1.38        | 0.59        | 2.15        | 7.93       | 8.99       | 6.49       | $1.02 \cdot 10^2$ | $6.69 \cdot 10^2$ | $0.55 \cdot 10^2$ | 0.08     | 0.23     | 0.07     |
| $\text{Zn}_2\text{NbN}_3$ | Electrons             |             |             |             |            |            |            |                   |                   |                   |          |          |          |
|                           | (-0.500; 0.500; 0)    | 1.03        | 0.94        | 0.40        | 8.62       | 8.59       | 7.81       | $1.65 \cdot 10^2$ | $2.02 \cdot 10^2$ | $2.20 \cdot 10^3$ | 0.10     | 0.11     | 0.50     |
| $\text{Zn}_2\text{NbN}_3$ | Holes                 |             |             |             |            |            |            |                   |                   |                   |          |          |          |
|                           | (-0.346; 0.653; 0)    | 3.86        | 0.87        | 1.88        | 8.98       | 9.60       | 8.26       | $0.06 \cdot 10^2$ | $1.97 \cdot 10^2$ | $0.40 \cdot 10^2$ | 0.01     | 0.10     | 0.04     |
| $\text{Zn}_2\text{Ta}_3$  | Electrons             |             |             |             |            |            |            |                   |                   |                   |          |          |          |
|                           | (-0.500; 0.500; 0)    | 1.15        | 1.12        | 0.43        | 7.31       | 6.23       | 5.68       | $1.77 \cdot 10^2$ | $2.47 \cdot 10^2$ | $3.68 \cdot 10^3$ | 0.12     | 0.16     | 0.89     |
| $\text{Zn}_2\text{Ta}_3$  | Holes                 |             |             |             |            |            |            |                   |                   |                   |          |          |          |
|                           | (-0.335; 0.664; 0)    | 2.24        | 0.75        | 1.69        | 7.83       | 8.37       | 7.23       | $0.29 \cdot 10^2$ | $3.78 \cdot 10^2$ | $0.73 \cdot 10^2$ | 0.04     | 0.16     | 0.07     |

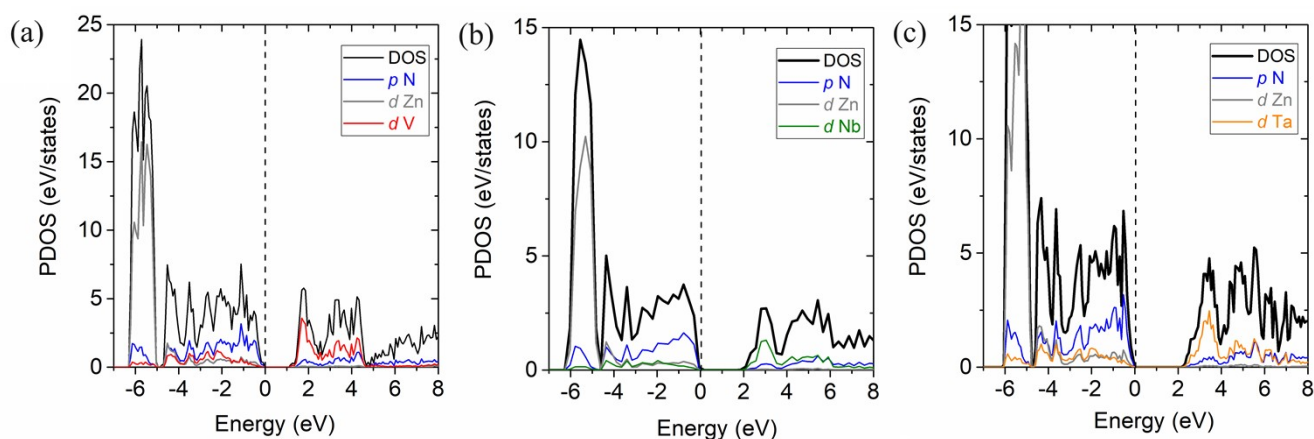

**Figure S1.** PDOS of bulk  $\text{Zn}_2\text{VN}_3$  (a),  $\text{Zn}_2\text{NbN}_3$  (b), and  $\text{Zn}_2\text{Ta}_3$  (c).

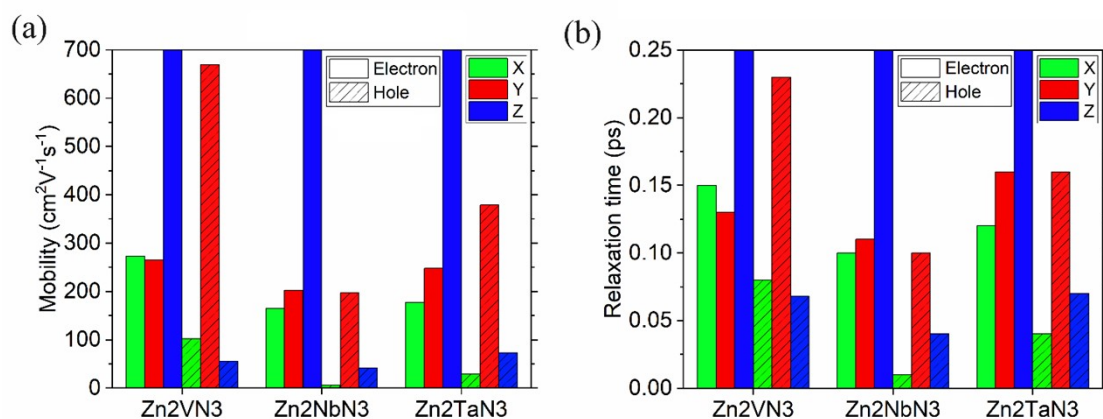

**Figure S2.** Magnified plots for charge mobility ( $\mu$ ) (a) and relaxation time ( $\tau$ ) (b) for holes and electrons in bulk  $\text{Zn}_2(\text{V}, \text{Nb}, \text{Ta})\text{N}_3$ .

**Table S5.** Calculated charge carrier effective mass ( $m_x^*$ ,  $m_y^*$  and  $m_z^*$  in units of electron mass  $m_0$ ), deformation potential ( $\delta_x$ ,  $\delta_y$ ,  $\delta_z$ , eV), mobility ( $\mu_x$ ,  $\mu_y$ , and  $\mu_z$ ,  $\text{cm}^2/\text{V}\cdot\text{s}$ ), and relaxation time ( $\tau_x$ ,  $\tau_y$  and  $\tau_z$ , ps) in 2D  $\text{Zn}_2(\text{V, Nb, Ta})\text{N}_3$  at  $T = 300$  K.

| Material                  | Reciprocal coordinate | $m_x^*/m_0$ | $m_y^*/m_0$ | $\delta_x$ | $\delta_y$ | $\mu_x$           | $\mu_y$           | $\tau_x$ | $\tau_y$ |
|---------------------------|-----------------------|-------------|-------------|------------|------------|-------------------|-------------------|----------|----------|
| $\text{Zn}_2\text{VN}_3$  | Electrons             |             |             |            |            |                   |                   |          |          |
|                           | (0; 0; 0)             | 2.15        | 4.07        | 1.67       | 4.00       | $1.30 \cdot 10^2$ | $0.12 \cdot 10^2$ | 0.16     | 0.03     |
|                           | Holes                 |             |             |            |            |                   |                   |          |          |
|                           | (-0.255; 0.255; 0)    | 2.55        | 2.31        | -0.92      | 1.75       | $0.44 \cdot 10^3$ | $1.33 \cdot 10^2$ | 0.63     | 0.17     |
| $\text{Zn}_2\text{NbN}_3$ | Electrons             |             |             |            |            |                   |                   |          |          |
|                           | (-0.500; 0.500; 0)    | 1.01        | 2.15        | 0.27       | 0.80       | $1.67 \cdot 10^4$ | $0.99 \cdot 10^3$ | 9.60     | 1.21     |
|                           | Holes                 |             |             |            |            |                   |                   |          |          |
|                           | (-0.216; 0.216; 0)    | 2.06        | 1.63        | 1.78       | 2.31       | $1.56 \cdot 10^2$ | $1.27 \cdot 10^2$ | 0.18     | 0.12     |
| $\text{Zn}_2\text{Ta}_3$  | Electrons             |             |             |            |            |                   |                   |          |          |
|                           | (-0.500; 0.500; 0)    | 0.88        | 2.39        | -1.53      | 0.57       | $0.63 \cdot 10^3$ | $1.67 \cdot 10^3$ | 0.31     | 2.27     |
|                           | Holes                 |             |             |            |            |                   |                   |          |          |
|                           | (-0.167; 0.167; 0)    | 2.16        | 2.95        | 1.00       | 2.30       | $3.41 \cdot 10^2$ | $0.47 \cdot 10^2$ | 0.42     | 0.08     |

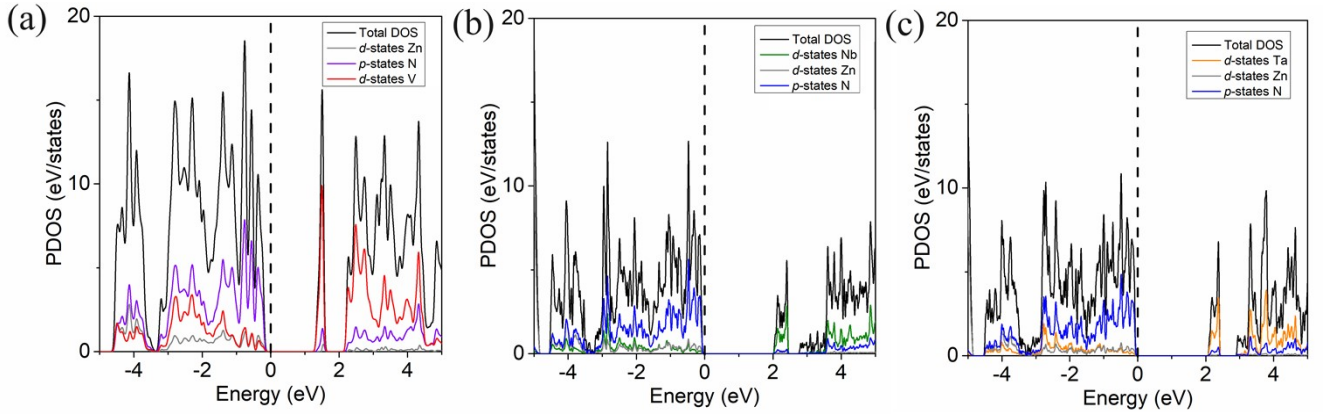

**Figure S3.** PDOS of 2D  $\text{Zn}_2\text{VN}_3$  (a), 2D  $\text{Zn}_2\text{NbN}_3$  (b), and 2D  $\text{Zn}_2\text{Ta}_3$  (c).

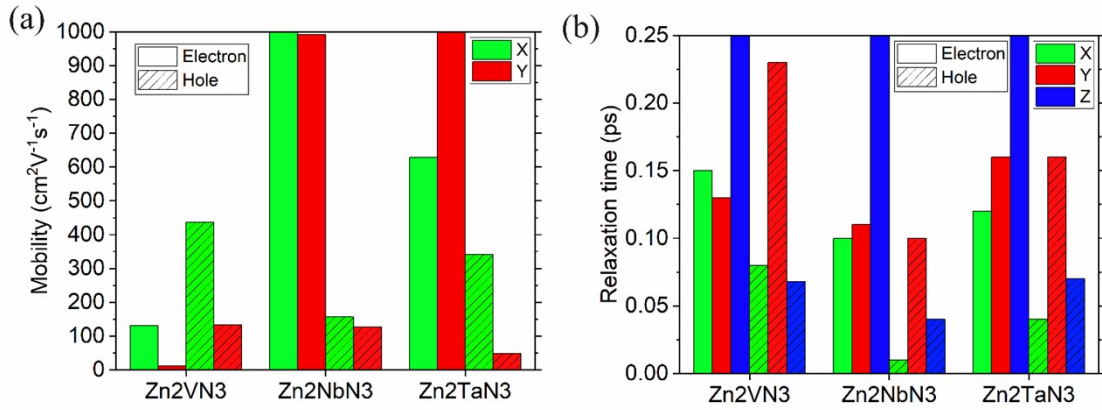

**Figure S4.** Magnified charge mobility ( $\mu$ ) (a) and relaxation time ( $\tau$ ) (b) for holes and electrons in 2D  $\text{Zn}_2(\text{V, Nb, Ta})\text{N}_3$ .

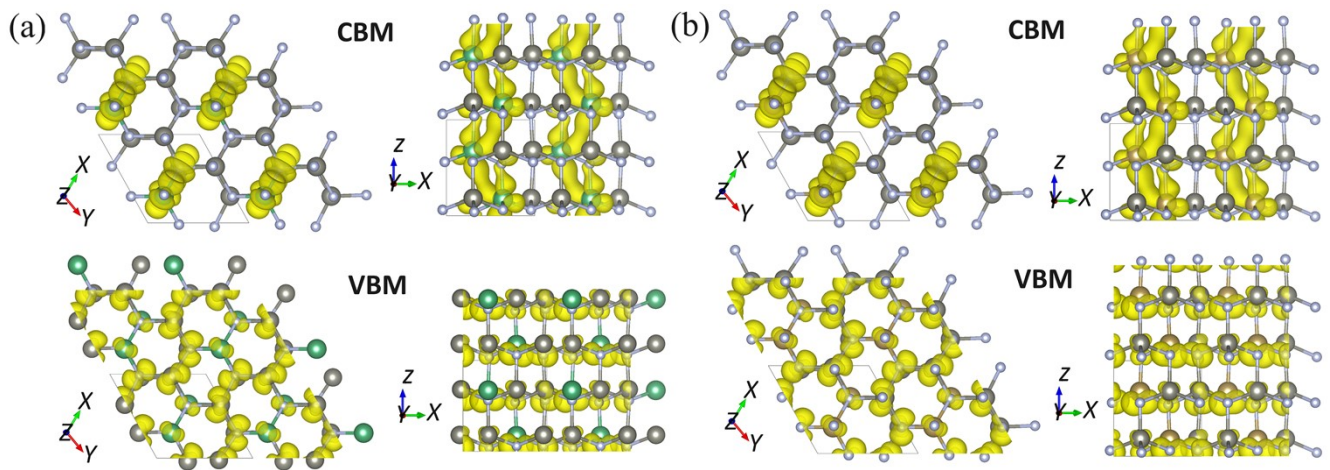

**Figure S5.** Top and side views of the spatial structure of wave functions in VBM and CBM for bulk  $\text{Zn}_2\text{NbN}_3$  (a) and  $\text{Zn}_2\text{TaN}_3$  (b) at the  $k$  points corresponding to VBM and CBM, respectively (Table S4). The isosurface of  $0.003 \text{ e } \text{\AA}^{-3}$  is adopted.

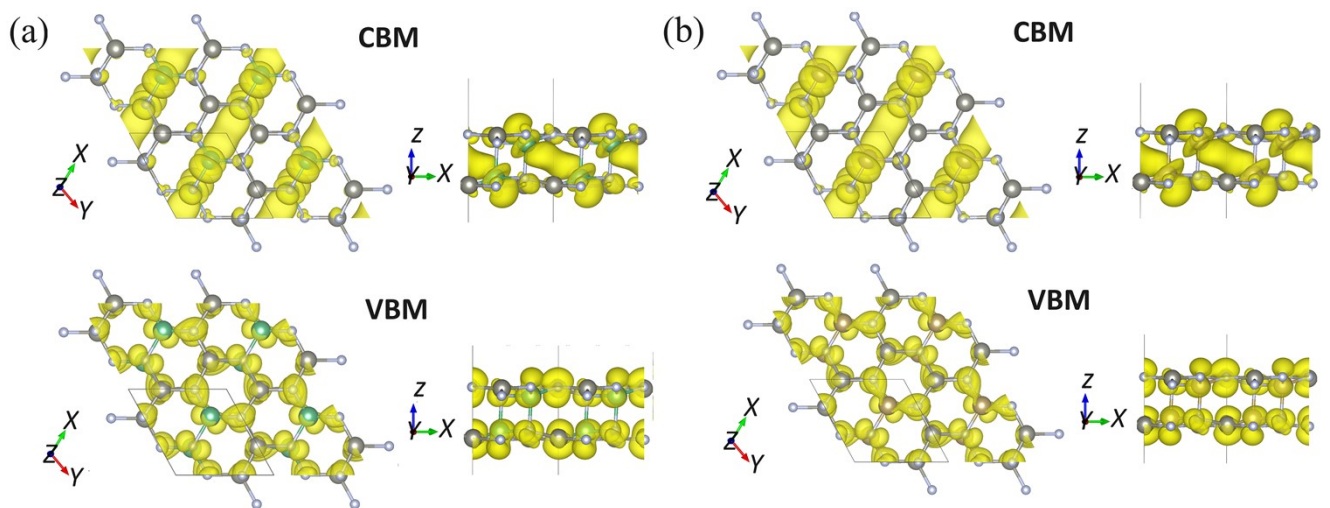

**Figure S6.** Top and side views of the spatial structure of wave functions in VBM and CBM for 2D  $\text{Zn}_2\text{NbN}_3$  (a) and 2D  $\text{Zn}_2\text{TaN}_3$  (b) at the  $k$  points corresponding to VBM and CBM, respectively (Table S5). The isosurface of  $0.003 \text{ e } \text{\AA}^{-3}$  is adopted.
